# Supplementary material for: Isolation and characterization of camelid single-domain antibodies against HER2
Source: PubMed Central journal article supplement (PMC6282393; doi:10.1186/s13104-018-3955-8), 2018-12-05
Supplement: 13104_2018_3955_MOESM2_ESM.pdf [file 13104_2018_3955_MOESM2_ESM.pdf]

## Human HER2

## Cyno HER2

## Mouse HER2

NRC-sdAb034

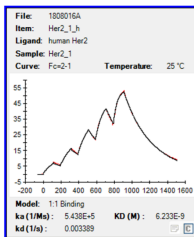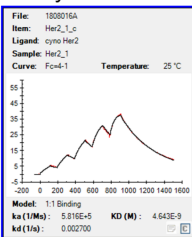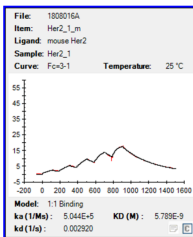

NRC-sdAb035

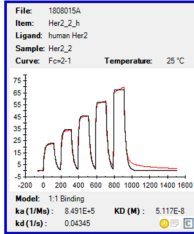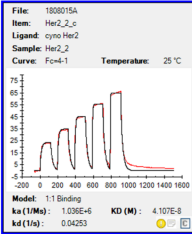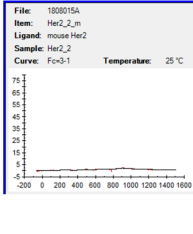

NRC-sdAb036

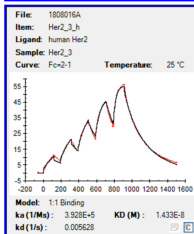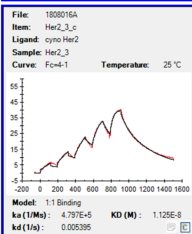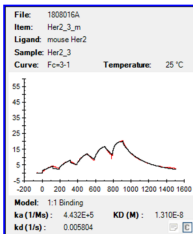

NRC-sdAb037

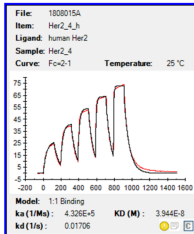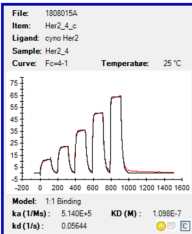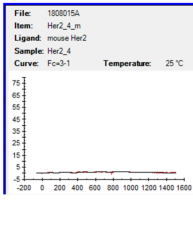

NRC-sdAb038

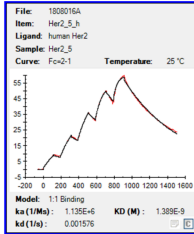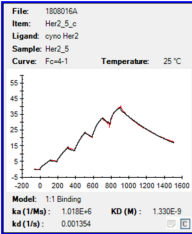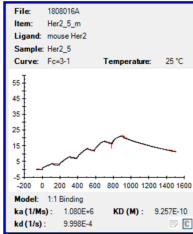

NRC-sdAb039

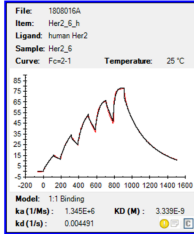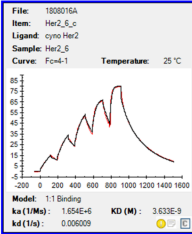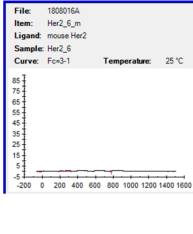

**Figure S2.** Complete sensorgrams for single-cycle kinetic analysis of V<sub>H</sub>Hs binding to HER2 by surface plasmon resonance.
