# Supplementary material for: Isolation and characterization of camelid single-domain antibodies against HER2
Source: PubMed Central journal article supplement (PMC6282393; doi:10.1186/s13104-018-3955-8), 2018-12-05
Supplement: 13104_2018_3955_MOESM3_ESM.pdf [file 13104_2018_3955_MOESM3_ESM.pdf]

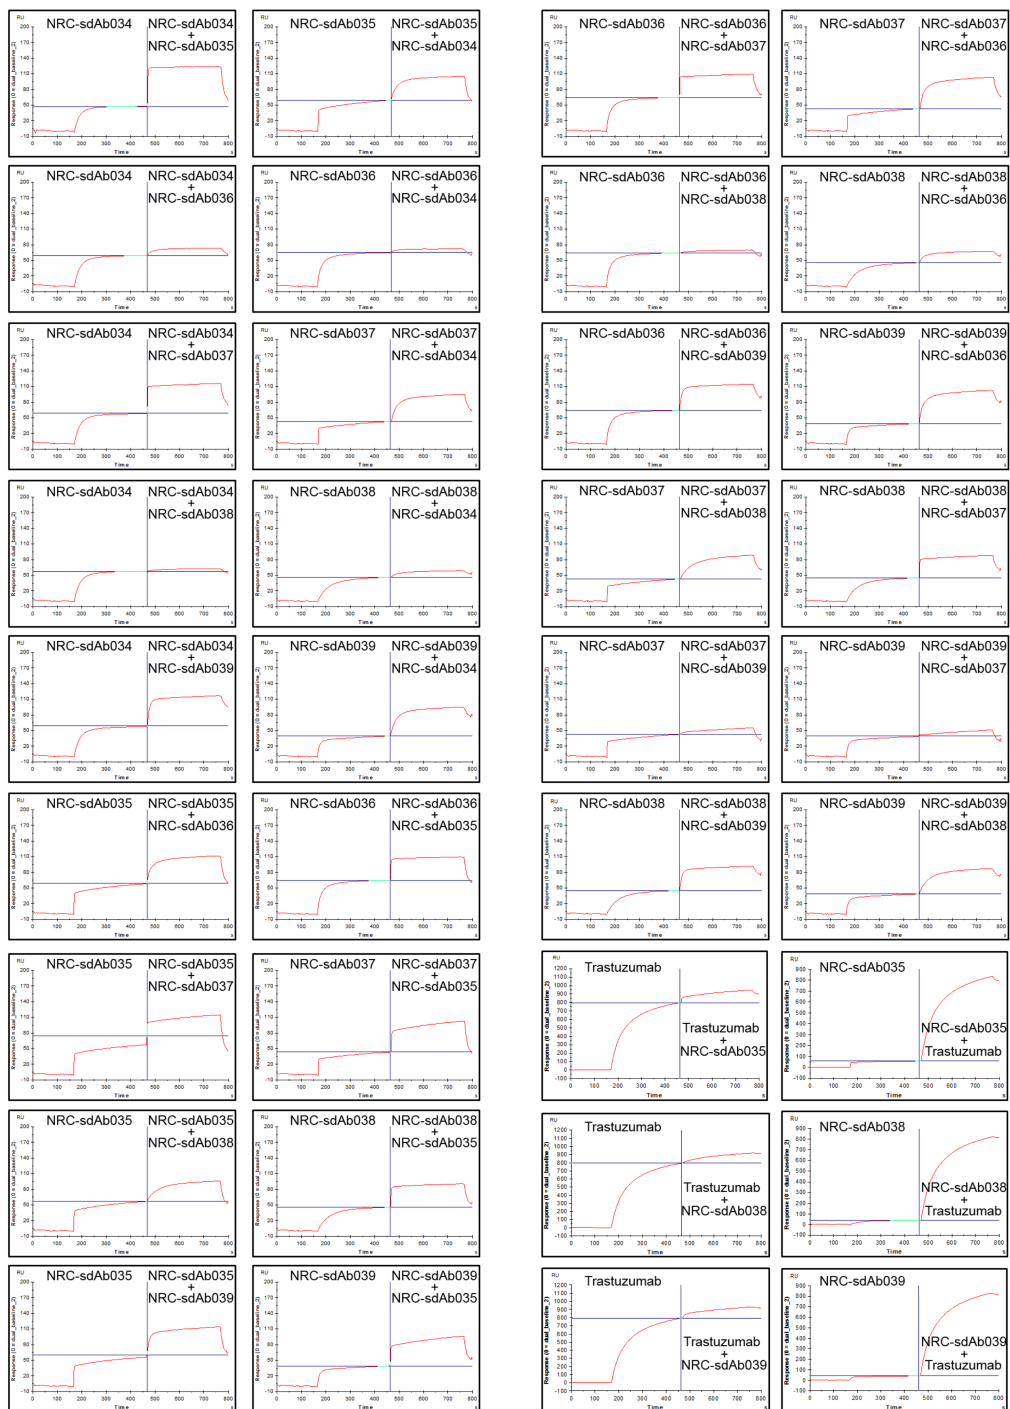

**Figure S3.** Complete sensorgrams for epitope binning SPR co-injection experiments. Data are shown for the human HER2 surface only. In the first injection, the HER2 surface was saturated using a concentration equivalent to  $20\times K_D$  of the first VHH (or 20 nM trastuzumab), then in the second injection, the first antibody was supplied in the presence of a second antibody (also  $20\times K_D$ ) to determine whether additional binding occurred. All possible permutations of antibodies were tested as described in the main text.
